# Supplementary material for: Effect of BCG Revaccination on Occupationally Exposed Medical Personnel Vaccinated against SARS-CoV-2
Source: MDPI journal article supplement (doi:10.3390/cells10113179), 2021-11-15
Supplement: s1 [file s1]

**Supplementary Table S1. Comparison of serum cytokine concentrations 30 days after the application of the BCG vaccine or a placebo.**

| Cytokine              | Placebo               | BCG                   | p    |
|-----------------------|-----------------------|-----------------------|------|
| IL-1 $\beta$ (pg/ml)  | 0.02(0.02-0.02)       | 0.135(0.02-0.021)     | 0.01 |
| IL-2 (pg/ml)          | 4.035(3.18-7.1)       | 4.1(3.18-7.1)         | 0.83 |
| IL-4 (pg/ml)          | 0.28(0.28-11.5)       | 0.28(0.28-2.55)       | 0.01 |
| IL-5 (pg/ml)          | 0.36(0.21-0.53)       | 0.43(0.43-1.84)       | 0.45 |
| IL-6 (pg/ml)          | 3.79(3.79-3.79)       | 3.79(3.79-3.79)       | 0.70 |
| IL-12p70 (pg/ml)      | 0.0683(0.0683-0.0683) | 0.135(0.02-0.21)      | 0.31 |
| IL-13 (pg/ml)         | 1.76(1.76-1.76)       | 1.76(1.76-1.76)       | 0.54 |
| IL-18 (pg/ml)         | 1.54(0.96-2.77)       | 3.065(0.34-7.52)      | 0.33 |
| IFN- $\gamma$ (pg/ml) | 0.8211(0.8211-0.8211) | 0.8211(0.8211-0.8211) | 0.54 |
| TNF- $\alpha$ (pg/ml) | 0.34(0.1-1)           | 0.22(0.1-1)           | 0.76 |
| GMCSF (pg/ml)         | 2.559(2.559-2.559)    | 2.559(2.559-2.559)    | 0.45 |

All values are expressed as medians (IQR).

**Supplementary Table S2. Comparison of serum cytokine concentrations 30 days after the application of a placebo and 30 days after de second dose of SARS-Cov-2 vaccine**

| Cytokine              | Placebo               | Placebo+SARS-Cov-2 vaccine | p       |
|-----------------------|-----------------------|----------------------------|---------|
| IL-1 $\beta$ (pg/ml)  | 0.02(0.02-0.02)       | 0.36(0.21-0.538)           | 0.00001 |
| IL-2 (pg/ml)          | 4.035(3.18-7.1)       | 7.1(7.1-7.1)               | 0.003   |
| IL-4 (pg/ml)          | 0.28(0.28-11.5)       | 2.86(2.22-4.43)            | 0.4777  |
| IL-5 (pg/ml)          | 0.36(0.21-0.53)       | 0.21(0.21-0.21)            | 0.0095  |
| IL-6 (pg/ml)          | 3.79(3.79-3.79)       | 3.79(3.79-8.1)             | 0.091   |
| IL-12p70 (pg/ml)      | 0.0683(0.0683-0.0683) | 0.0683(0.0683-0.0683)      | 0.145   |
| IL-13 (pg/ml)         | 1.76(1.76-1.76)       | 1.76(1.76-2.5)             | 0.360   |
| IL-18 (pg/ml)         | 1.54(0.96-2.77)       | 8.0348(2.61-15.49)         | 0.0013  |
| IFN- $\gamma$ (pg/ml) | 0.8211(0.8211-0.8211) | 0.8211(0.8211-2.0327)      | 0.0017  |
| TNF- $\alpha$ (pg/ml) | 0.34(0.1-1)           | 1.944(0.1-3.67)            | 0.0153  |
| GMCSF (pg/ml)         | 2.559(2.559-2.559)    | 2.559(2.559-12.6)          | 0.106   |

All values are expressed as medians (IQR).

**Supplementary Table S3. Comparison of serum cytokine concentrations 30 days after the application of a BCG vaccine and 30 days after de second dose of SARS-Cov-2 vaccine**

| Cytokine              | BCG                   | BCG+SARS-Cov-2 vaccine | P       |
|-----------------------|-----------------------|------------------------|---------|
| IL-1 $\beta$ (pg/ml)  | 0.135(0.02-0.021)     | 0.538(0.472-0.672)     | 0.00001 |
| IL-2 (pg/ml)          | 4.1(3.18-7.1)         | 7.1(7.1-7.1)           | 0.0001  |
| IL-4 (pg/ml)          | 0.28(0.28-2.55)       | 11.5(11.5-11.5)        | 0.00001 |
| IL-5 (pg/ml)          | 0.43(0.43-1.84)       | 1.74(0.93-3.68)        | 0.00001 |
| IL-6 (pg/ml)          | 3.79(3.79-3.79)       | 8.1(8.1-8.1)           | 0.00001 |
| IL-12p70 (pg/ml)      | 0.135(0.02-0.21)      | 0.5388(0.472-0.672)    | 0.00001 |
| IL-13 (pg/ml)         | 1.76(1.76-1.76)       | 2.5(2.5-2.5)           | 0.00001 |
| IL-18 (pg/ml)         | 3.065(0.34-7.52)      | 23(8.97-43.42)         | 0.00001 |
| IFN- $\gamma$ (pg/ml) | 0.8211(0.8211-0.8211) | 7.7216(3.272-12.3844)  | 0.00001 |
| TNF- $\alpha$ (pg/ml) | 0.22(0.1-1)           | 5.1777(1.245-6.3)      | 0.00001 |
| GMCSF (pg/ml)         | 2.559(2.559-2.559)    | 12.6(12.6-12.6)        | 0.00001 |

All values are expressed as medians (IQR).
